# Supplementary material for: The association between skeletal muscle measures and chemotherapy‐induced toxicity in non‐small cell lung cancer patients
Source: PubMed Central journal article supplement — J Cachexia Sarcopenia Muscle. 2022 Mar 18;13(3):1554–64. doi: 10.1002/jcsm.12967 (PMC9178405; doi:10.1002/jcsm.12967), 2022-03-18
Supplement: JCSM-13-1554-s001.pdf [file JCSM-13-1554-s001.pdf]

## **SUPPLEMENTARY MATERIAL**

**Table S1A.** Chemotherapy-induced toxicity stratified by SMM status

**Table S1B.** Chemotherapy-induced toxicity stratified by SMD status

**Figure S1.** Chemotherapy-induced haematological toxicity stratified by SMM and SMD status

**Figure S2.** Chemotherapy-induced non-haematological toxicity stratified by SMM and SMD status

**Table S1A. Chemotherapy-induced toxicity stratified by SMM status**

| <b>Chemotherapy-induced toxicity</b>                             | <b>N</b> | <b>All patients</b> | <b>N</b> | <b>Low SMM</b> | <b>N</b> | <b>Intermediate SMM</b> | <b>N</b> | <b>High SMM</b> | <b>p-value*</b>   |
|------------------------------------------------------------------|----------|---------------------|----------|----------------|----------|-------------------------|----------|-----------------|-------------------|
| <b>Haematological toxicities</b>                                 |          |                     |          |                |          |                         |          |                 |                   |
| Nadir Hb (mmol/L), median (IQR)                                  | 295      | 6.0 (5.5-6.9)       | 99       | 5.7 (5.2-6.5)  | 98       | 6.0 (5.4-6.8)           | 98       | 6.5 (5.8-7.3)   | <b>&lt;0.001*</b> |
| Anaemia, any grade, n (%)                                        | 295      | 225 (76.3)          | 99       | 86 (86.9)      | 98       | 75 (75.8)               | 98       | 64 (64.6)       | <b>0.002*</b>     |
| Anaemia, grade 3/4, n (%)                                        | 295      | 27 (9.2)            | 99       | 17 (17.2)      | 98       | 7 (7.1)                 | 98       | 3 (3.1)         | <b>0.002*</b>     |
| Nadir leukocytes ( $\cdot 10^9/L$ ), median (IQR)                | 295      | 3.3 (2.4-4.5)       | 99       | 3.1 (2.1-4.3)  | 98       | 3.6 (2.4-4.7)           | 98       | 3.4 (2.4-4.6)   | 0.30              |
| Leukocytopenia, any grade, n (%)                                 | 295      | 195 (66.1)          | 99       | 67 (67.7)      | 98       | 61 (62.2)               | 98       | 67 (68.4)       | 0.61              |
| Leukocytopenia, grade 3/4, n (%)                                 | 295      | 48 (16.3)           | 99       | 20 (20.2)      | 99       | 13 (13.1)               | 99       | 15 (15.2)       | 0.38              |
| Nadir neutrophils ( $\cdot 10^9/L$ ), median (IQR)               | 205      | 1.5 (0.8-2.4)       | 71       | 1.2 (0.6-2.4)  | 63       | 1.7 (0.7-2.6)           | 71       | 1.3 (0.9-2.0)   | 0.30              |
| Neutropenia, any grade, n (%)                                    | 205      | 110 (53.7)          | 71       | 42 (59.2)      | 63       | 25 (39.7)               | 71       | 43 (60.6)       | <b>0.03*</b>      |
| Neutropenia, grade 3/4, n (%)                                    | 205      | 65 (31.7)           | 71       | 25 (35.2)      | 63       | 17 (27.0)               | 71       | 23 (32.4)       | 0.59              |
| Nadir thrombocytes ( $\cdot 10^9/L$ ), median (IQR)              | 295      | 134 (75-203)        | 99       | 127 (70-192)   | 98       | 149 (92-227)            | 98       | 129 (73-195)    | 0.08              |
| Thrombocytopenia, any grade, n (%)                               | 295      | 166 (55.9)          | 99       | 60 (60.6)      | 98       | 48 (49.0)               | 98       | 58 (59.2)       | 0.22              |
| Thrombocytopenia, grade 3/4, n (%)                               | 295      | 42 (14.2)           | 99       | 19 (19.2)      | 98       | 13 (13.3)               | 98       | 10 (10.2)       | 0.19              |
| Overall haematological toxicity <sup>^</sup> , any grade, n (%)  | 295      | 266 (90.2)          | 99       | 92 (92.9)      | 98       | 87 (88.8)               | 98       | 87 (88.8)       | 0.41              |
| Overall haematological toxicity <sup>^</sup> , grade 3/4, n (%)  | 295      | 108 (36.6)          | 99       | 48 (48.5)      | 98       | 28 (28.6)               | 98       | 32 (32.7)       | <b>0.007*</b>     |
| <b>Non-haematological toxicities</b>                             |          |                     |          |                |          |                         |          |                 |                   |
| Nephrotoxicity, any grade, n (%)                                 | 297      | 84 (28.3)           | 99       | 27 (27.3)      | 99       | 30 (30.3)               | 99       | 27 (27.3)       | 0.86              |
| Nephrotoxicity, grade $\geq 2$ , n (%)                           | 297      | 15 (5.1)            | 99       | 5 (5.1)        | 99       | 4 (4.0)                 | 99       | 6 (6.1)         | 0.81              |
| Neurotoxicity, any grade, n (%)                                  | 297      | 84 (28.3)           | 99       | 29 (29.3)      | 99       | 30 (30.3)               | 99       | 25 (25.3)       | 0.71              |
| Neurotoxicity, grade $\geq 2$ , n (%)                            | 297      | 27 (9.1)            | 99       | 11 (11.1)      | 99       | 9 (9.1)                 | 99       | 7 (7.1)         | 0.61              |
| Esophagitis, any grade, n (%)                                    | 297      | 91 (30.6)           | 99       | 30 (30.3)      | 99       | 28 (28.3)               | 99       | 33 (33.3)       | 0.74              |
| Esophagitis, grade $\geq 2$ , n (%)                              | 297      | 36 (12.1)           | 99       | 10 (10.1)      | 99       | 10 (10.1)               | 99       | 16 (16.2)       | 0.32              |
| Overall non-haem. toxicity <sup>^</sup> , any grade, n (%)       | 297      | 188 (63.3)          | 99       | 68 (68.7)      | 99       | 60 (60.6)               | 99       | 60 (60.6)       | 0.40              |
| Overall non-haem. toxicity <sup>^</sup> , grade $\geq 2$ , n (%) | 297      | 73 (24.6)           | 99       | 22 (22.2)      | 99       | 23 (23.2)               | 99       | 28 (28.3)       | 0.57              |
| <b>Dose-limiting toxicities, n (%)</b>                           |          |                     |          |                |          |                         |          |                 |                   |
| Switching treatment (cisplatin to carboplatin)                   | 133      | 30 (22.6)           | 45       | 11 (24.4)      | 44       | 11 (25.0)               | 44       | 8 (18.2)        | 0.70              |
| Treatment delay ( $\geq 7$ days)                                 | 297      | 49 (16.5)           | 99       | 20 (20.2)      | 99       | 13 (13.1)               | 99       | 16 (16.2)       | 0.41              |
| Treatment de-escalation ( $\geq 25\%$ )                          | 297      | 37 (12.5)           | 99       | 17 (17.2)      | 99       | 8 (8.1)                 | 99       | 12 (12.1)       | 0.15              |
| Treatment termination                                            | 297      | 28 (9.4)            | 99       | 6 (6.1)        | 99       | 11 (11.1)               | 99       | 11 (11.1)       | 0.37              |
| Treatment-related hospitalization                                | 297      | 97 (32.7)           | 99       | 41 (41.4)      | 99       | 30 (30.3)               | 99       | 26 (26.3)       | 0.063             |
| Overall dose-limiting toxicity <sup>^</sup>                      | 297      | 165 (55.6)          | 99       | 64 (64.6)      | 99       | 48 (48.5)               | 99       | 53 (53.5)       | 0.065             |

---

\* p-value < 0.05 based on Kruskal Wallis Test (for continuous independent variable) and Pierson Chi-square test or Fisher's Exact Test (in case the cell count in any of the tables was <5) (for categorical independent variable).

^ Composite endpoints: overall non-haematological toxicity: nephrotoxicity OR neurotoxicity OR esophagitis; overall haematological toxicity: anaemia OR leukocytopenia OR neutropenia OR thrombocytopenia; overall dose-limiting toxicity: switching treatment (cisplatin to carboplatin) OR treatment delay ( $\geq 7$  days) OR treatment de-escalation ( $\geq 25\%$ ) OR treatment termination OR treatment-related hospitalization.

Abbreviations: Hb: haemoglobin; IQR, interquartile range; SMM, skeletal muscle mass.

---

**Table S1B. Chemotherapy-induced toxicity stratified by SMD status**

| <b>Chemotherapy-induced toxicity</b>                             | <b>N</b> | <b>All patients</b> | <b>N</b> | <b>Low SMD</b> | <b>N</b> | <b>Intermediate SMD</b> | <b>N</b> | <b>High SMD</b> | <b>p-value*</b>   |
|------------------------------------------------------------------|----------|---------------------|----------|----------------|----------|-------------------------|----------|-----------------|-------------------|
| <b>Haematological toxicities</b>                                 |          |                     |          |                |          |                         |          |                 |                   |
| Nadir Hb (mmol/L), median (IQR)                                  | 282      | 6.1 (5.5-6.9)       | 95       | 5.8 (5.2-6.8)  | 94       | 6.2 (5.7-7.0)           | 93       | 6.1 (5.5-7.3)   | <b>0.012*</b>     |
| Anaemia, any grade, n (%)                                        | 282      | 215 (76.2)          | 95       | 79 (83.2)      | 94       | 71 (75.5)               | 93       | 65 (69.9)       | 0.10              |
| Anaemia, grade 3/4, n (%)                                        | 282      | 26 (9.2)            | 95       | 12 (12.6)      | 94       | 8 (8.5)                 | 93       | 6 (6.5)         | 0.33              |
| Nadir leukocytes ( $\cdot 10^9/L$ ), median (IQR)                | 282      | 3.4 (2.4-4.5)       | 95       | 3.0 (2.0-4.1)  | 94       | 3.5 (2.5-4.7)           | 93       | 3.5 (2.6-4.7)   | <b>0.041*</b>     |
| Leukocytopenia, any grade, n (%)                                 | 282      | 185 (65.6)          | 95       | 69 (72.6)      | 94       | 58 (61.7)               | 93       | 58 (62.4)       | 0.21              |
| Leukocytopenia, grade 3/4, n (%)                                 | 282      | 48 (17.0)           | 95       | 22 (23.2)      | 94       | 11 (11.6)               | 93       | 15 (16.0)       | 0.10              |
| Nadir neutrophils ( $\cdot 10^9/L$ ), median (IQR)               | 193      | 1.5 (0.7-2.4)       | 60       | 1.3 (0.6-2.6)  | 69       | 1.5 (0.9-2.4)           | 64       | 1.6 (0.8-2.4)   | 0.69              |
| Neutropenia, any grade, n (%)                                    | 193      | 102 (52.8)          | 60       | 39 (65.0)      | 69       | 35 (50.7)               | 64       | 28 (43.8)       | 0.05              |
| Neutropenia, grade 3/4, n (%)                                    | 193      | 61 (31.6)           | 60       | 22 (36.7)      | 69       | 19 (27.5)               | 64       | 20 (31.3)       | 0.54              |
| Nadir thrombocytes ( $\cdot 10^9/L$ ), median (IQR)              | 282      | 134 (75-203)        | 95       | 100 (53-174)   | 94       | 150 (96-227)            | 93       | 144 (82-225)    | <b>&lt;0.001*</b> |
| Thrombocytopenia, any grade, n (%)                               | 282      | 157 (55.7)          | 95       | 67 (70.5)      | 94       | 44 (46.8)               | 93       | 46 (49.5)       | <b>0.001*</b>     |
| Thrombocytopenia, grade 3/4, n (%)                               | 282      | 42 (14.9)           | 95       | 23 (24.2)      | 94       | 8 (8.5)                 | 93       | 11 (11.8)       | <b>0.006*</b>     |
| Overall haematological toxicity <sup>^</sup> , any grade, n (%)  | 282      | 253 (89.7)          | 95       | 89 (93.7)      | 94       | 85 (90.4)               | 93       | 79 (84.9)       | 0.15              |
| Overall haematological toxicity <sup>^</sup> , grade 3/4, n (%)  | 282      | 103 (36.5)          | 95       | 40 (42.1)      | 94       | 32 (34.0)               | 93       | 31 (33.3)       | 0.38              |
| <b>Non-haematological toxicities</b>                             |          |                     |          |                |          |                         |          |                 |                   |
| Nephrotoxicity, any grade, n (%)                                 | 284      | 78 (27.5)           | 95       | 29 (30.5)      | 95       | 25 (26.3)               | 94       | 24 (25.5)       | 0.71              |
| Nephrotoxicity, grade $\geq 2$ , n (%)                           | 284      | 13 (4.6)            | 95       | 7 (7.4)        | 95       | 4 (4.2)                 | 94       | 2 (2.1)         | 0.22              |
| Neurotoxicity, any grade, n (%)                                  | 284      | 83 (29.2)           | 95       | 26 (27.4)      | 95       | 30 (31.6)               | 94       | 27 (28.7)       | 0.81              |
| Neurotoxicity, grade $\geq 2$ , n (%)                            | 284      | 27 (9.5)            | 95       | 11 (11.6)      | 95       | 8 (8.4)                 | 94       | 8 (8.4)         | 0.70              |
| Esophagitis, any grade, n (%)                                    | 284      | 88 (31.0)           | 95       | 33 (34.7)      | 95       | 26 (27.4)               | 94       | 29 (30.9)       | 0.55              |
| Esophagitis, grade $\geq 2$ , n (%)                              | 284      | 36 (12.7)           | 95       | 14 (14.7)      | 95       | 12 (12.6)               | 94       | 10 (10.6)       | 0.70              |
| Overall non-haem. toxicity <sup>^</sup> , any grade, n (%)       | 284      | 178 (62.7)          | 95       | 59 (62.1)      | 95       | 63 (66.3)               | 94       | 56 (59.6)       | 0.63              |
| Overall non-haem. toxicity <sup>^</sup> , grade $\geq 2$ , n (%) | 284      | 71 (25.0)           | 95       | 27 (28.4)      | 95       | 24 (25.3)               | 94       | 20 (21.3)       | 0.52              |
| <b>Dose-limiting toxicities, n (%)</b>                           |          |                     |          |                |          |                         |          |                 |                   |
| Switching treatment (cisplatin to carboplatin)                   | 127      | 29 (22.8)           | 43       | 10 (27.8)      | 43       | 12 (30.0)               | 41       | 7 (13.7)        | 0.13              |
| Treatment delay ( $\geq 7$ days)                                 | 284      | 47 (16.5)           | 95       | 15 (15.8)      | 95       | 17 (17.9)               | 95       | 15 (16.0)       | 0.91              |
| Treatment de-escalation ( $\geq 25\%$ )                          | 284      | 35 (12.3)           | 95       | 16 (16.8)      | 95       | 10 (10.5)               | 95       | 9 (9.6)         | 0.26              |
| Treatment termination                                            | 284      | 24 (8.5)            | 95       | 9 (9.5)        | 95       | 11 (11.6)               | 95       | 4 (4.3)         | 0.18              |
| Treatment-related hospitalization                                | 284      | 94 (33.1)           | 95       | 42 (44.2)      | 95       | 32 (33.7)               | 95       | 20 (21.3)       | <b>0.004*</b>     |
| Overall dose-limiting toxicity <sup>^</sup>                      | 284      | 157 (55.3)          | 95       | 61 (64.2)      | 95       | 59 (62.1)               | 95       | 37 (39.4)       | <b>0.001*</b>     |

---

\* p-value < 0.05 based on Kruskal Wallis Test (for continuous independent variable) and Pierson Chi-square test or Fisher's Exact Test (in case the cell count in any of the tables was <5) (for categorical independent variable).

^ Composite endpoints: overall non-haematological toxicity: nephrotoxicity OR neurotoxicity OR esophagitis; overall haematological toxicity: anaemia OR leukocytopenia OR neutropenia OR thrombocytopenia; overall dose-limiting toxicity: switching treatment (cisplatin to carboplatin) OR treatment delay ( $\geq 7$  days) OR treatment de-escalation ( $\geq 25\%$ ) OR treatment termination OR treatment-related hospitalization.

Abbreviations: Hb: haemoglobin; IQR, interquartile range; SMD, skeletal muscle density.

---

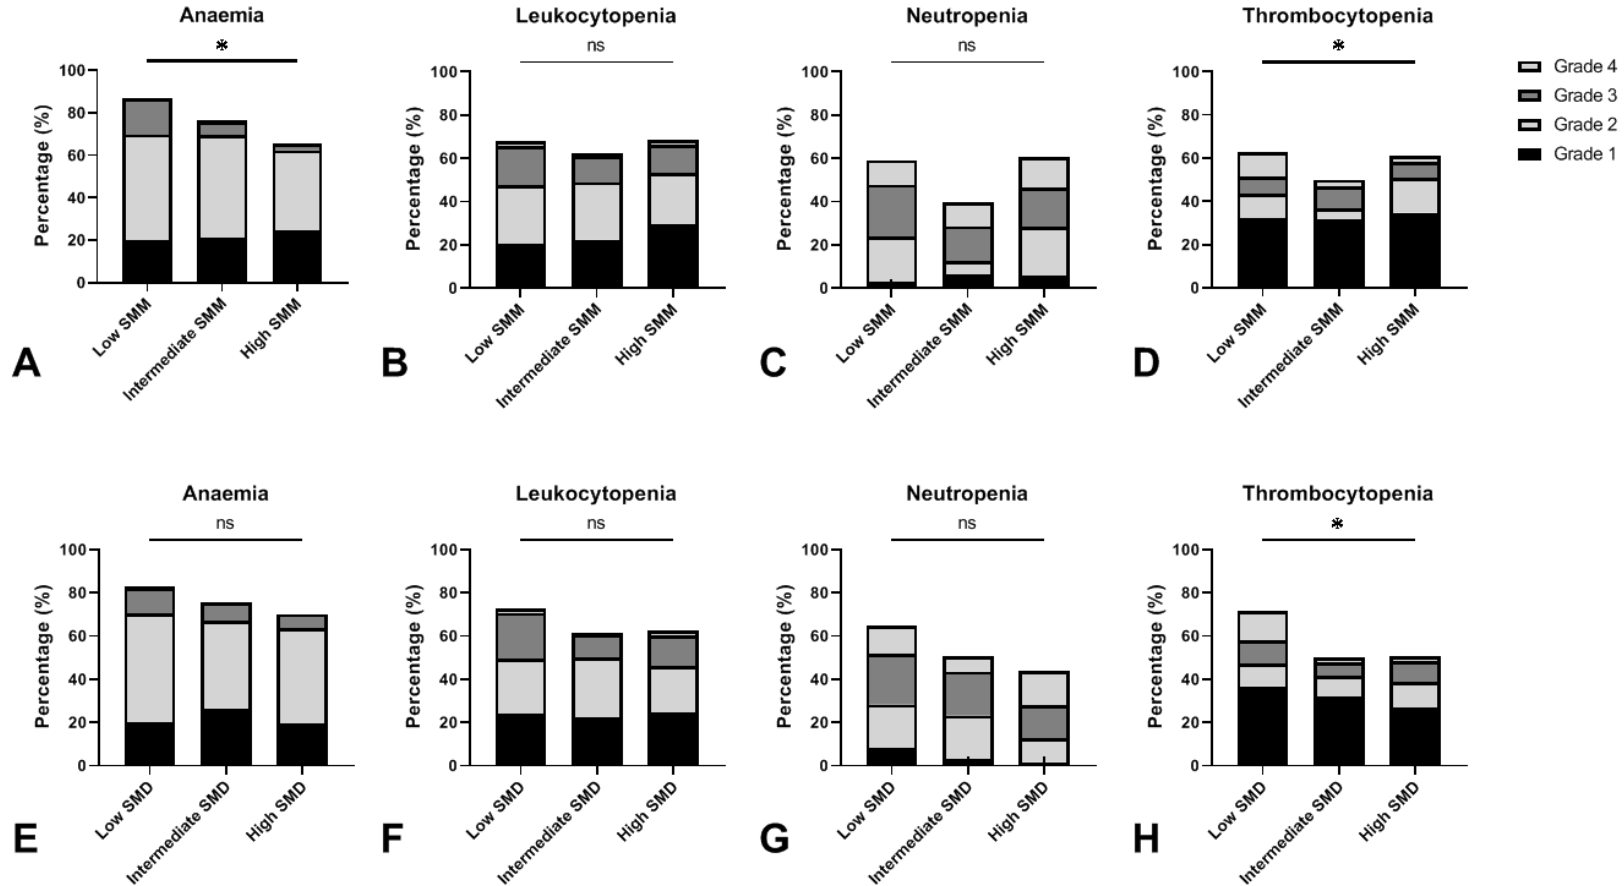

**Figure S1. Chemotherapy-induced haematological toxicity stratified by SMM and SMD status.**

Percentage of chemotherapy-induced haematological toxicity scored using CTCAE, stratified by low, intermediate and high SMM and SMD status using the Pierson Chi-square test or Fisher's Exact Test (in case the cell count in any of the tables was <5). \* $p < 0.05$ . **A.** Anaemia stratified by SMM status. **B.** Leukocytopenia stratified by SMM status. **C.** Neutropenia stratified by SMM status. **D.** Thrombocytopenia stratified by SMM status. **E.** Anaemia stratified by SMD status. **F.** Leukocytopenia stratified by SMD status. **G.** Neutropenia stratified by SMD status. **H.** Thrombocytopenia stratified by SMD status. Abbreviations: CTCAE: Common Terminology Criteria for Adverse Events; ns: not statistically significant; SMD: skeletal muscle density; SMM: skeletal muscle mass.

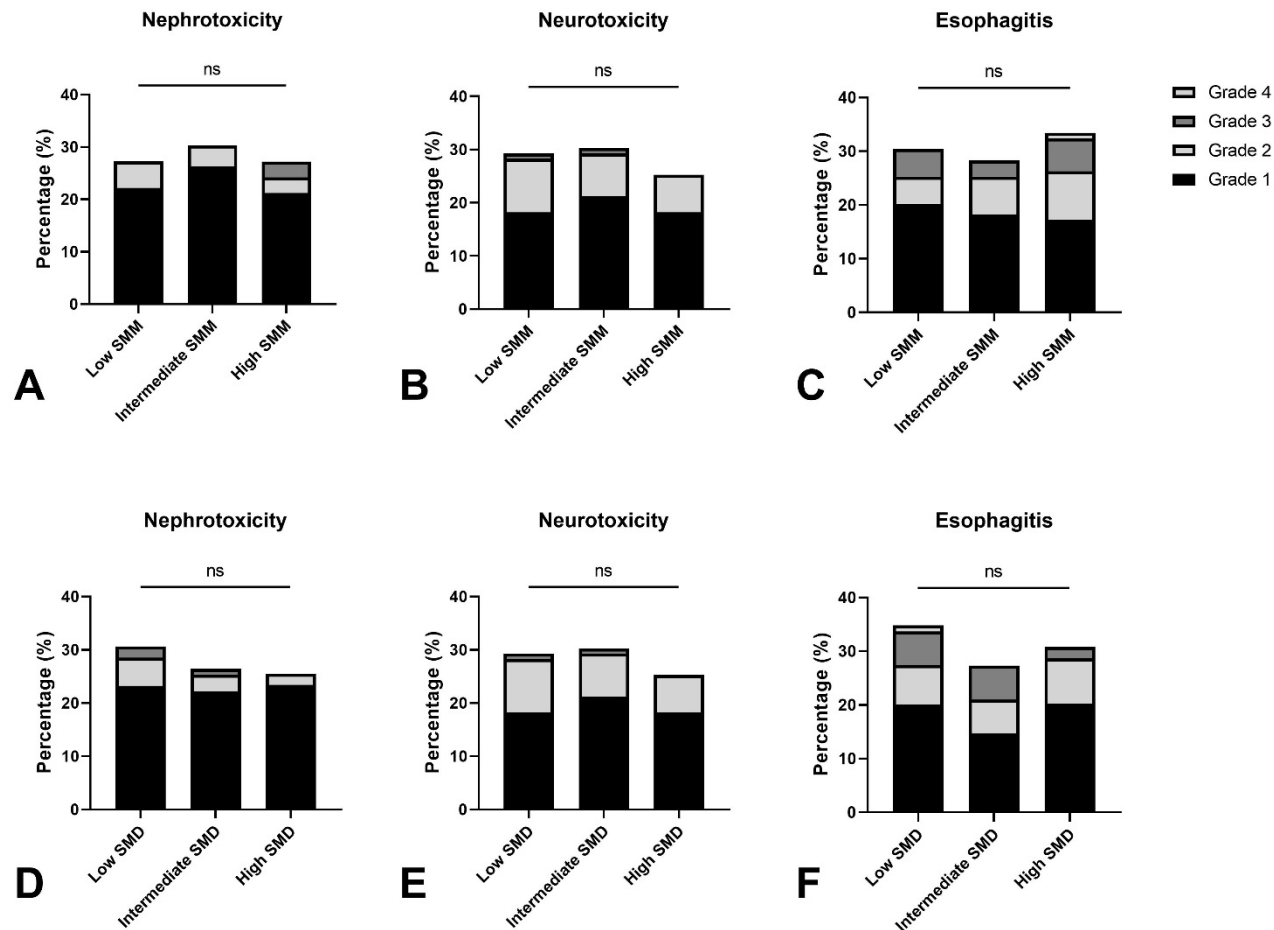

**Figure S2. Chemotherapy-induced non-haematological toxicity stratified by SMM and SMD status.**

Percentage of chemotherapy-induced non-haematological toxicity scored using CTCAE, stratified by low, intermediate and high SMM and SMD status using the Pearson Chi-square test or Fisher's Exact Test (in case the cell count in any of the tables was <5). \* $p < 0.05$ . **A.** Nephrotoxicity stratified by SMM status. **B.** Neurotoxicity stratified by SMM status. **C.** Esophagitis stratified by SMM status. **D.** Nephrotoxicity stratified by SMD status. **E.** Neurotoxicity stratified by SMD status. **F.** Esophagitis stratified by SMD status. Abbreviations: CTCAE: Common Terminology Criteria for Adverse Events; ns: not statistically significant; SMD: skeletal muscle density; SMM: skeletal muscle mass.
